# Supplementary material for: Integrated Spatiotemporal and Statistical Approach for Ecological Livability Index Mapping in semi/ arid urban environments
Source: Research Square preprint supplement (doi:10.21203/rs.3.rs-7355135/v1), 2025-08-27
Supplement: Supplementary file 1 [file eb2817cb3bd4af7e4f40fa8b.docx]

**SUPPLEMENTARY MATERIAL**

**for**

**Integrated Spatiotemporal and Statistical Approach for Ecological Livability Index Mapping in semi/ arid urban environments**

**List of Supplementary Figures:**

**Figure SM1.** …..

**
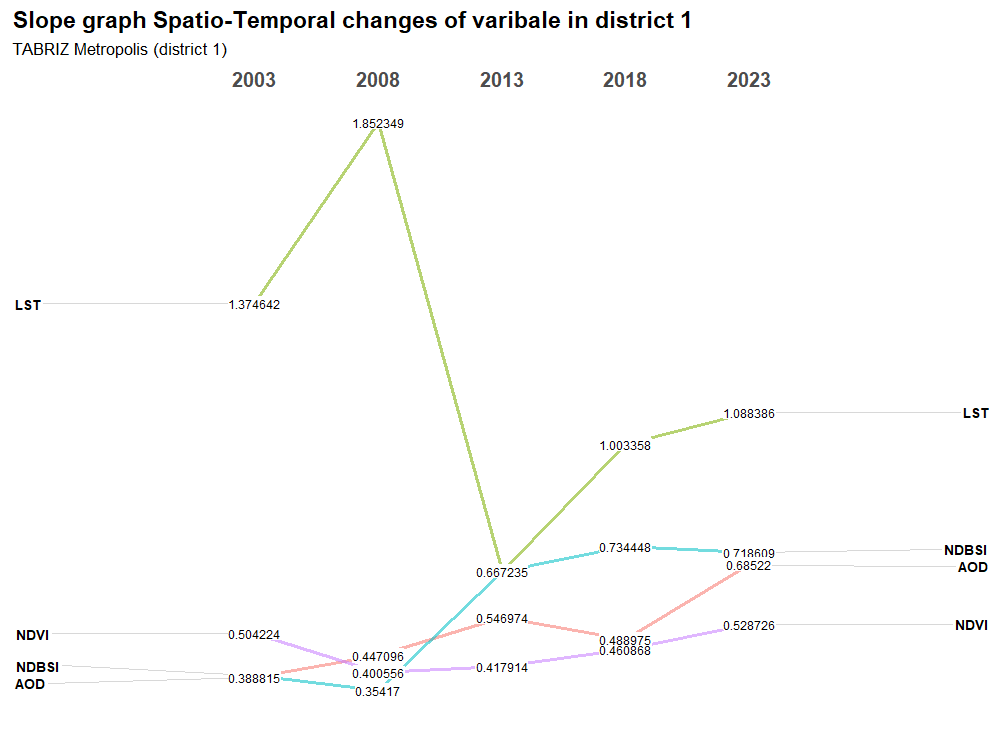
**

**Figure SM2.** …..

**
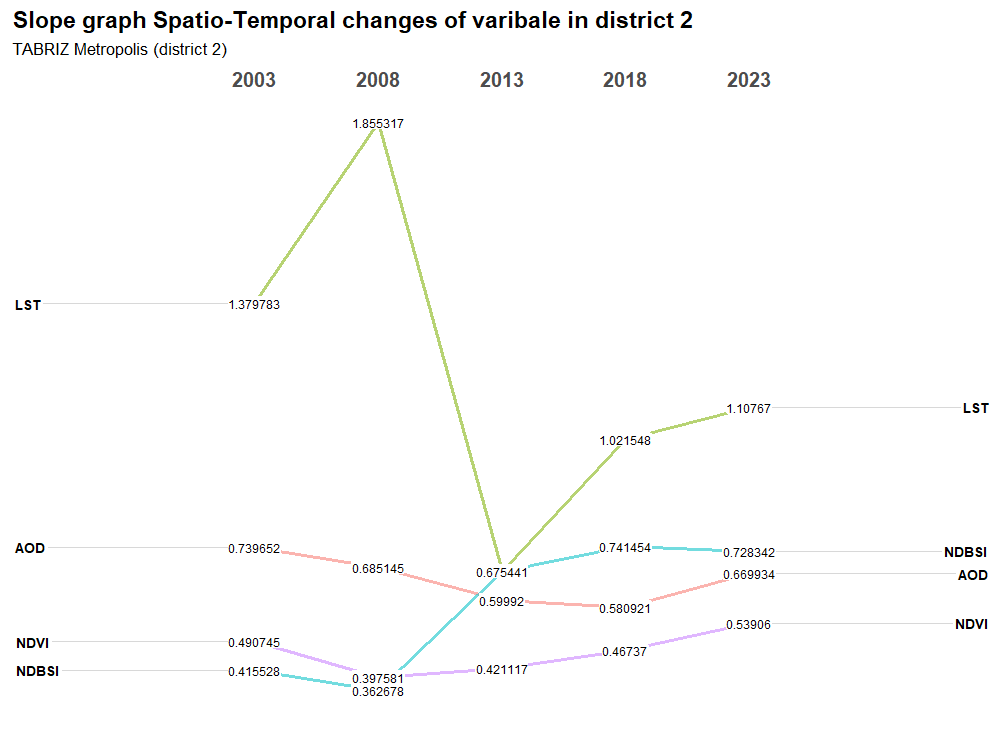
**

**Figure SM3.** …..

**
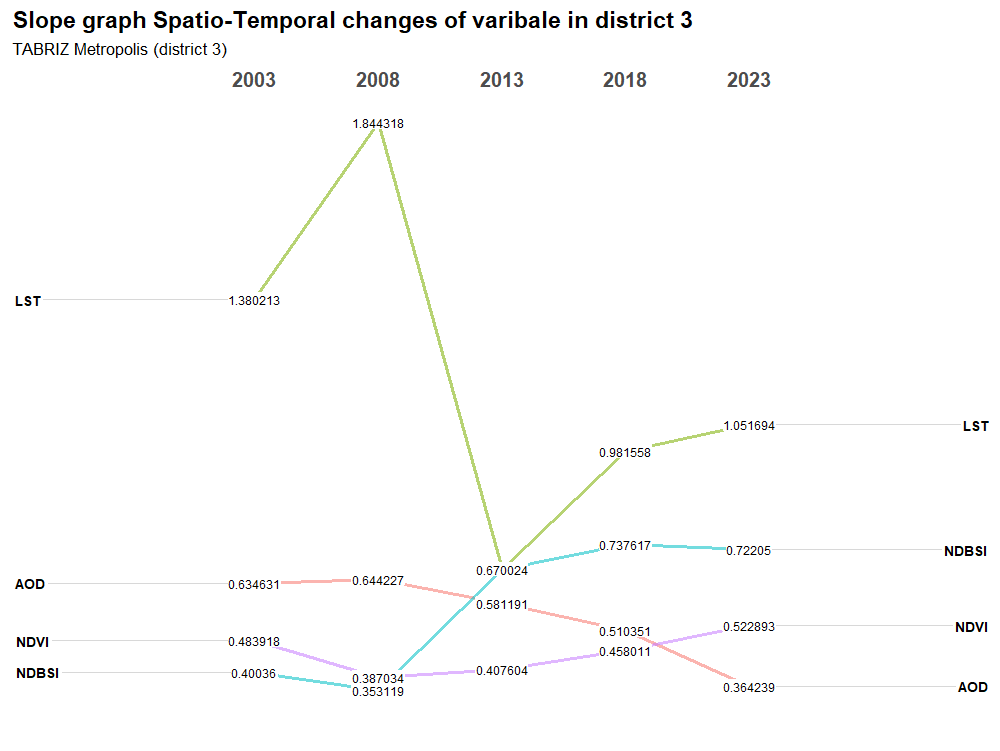
**

**Figure SM4.** …..

**
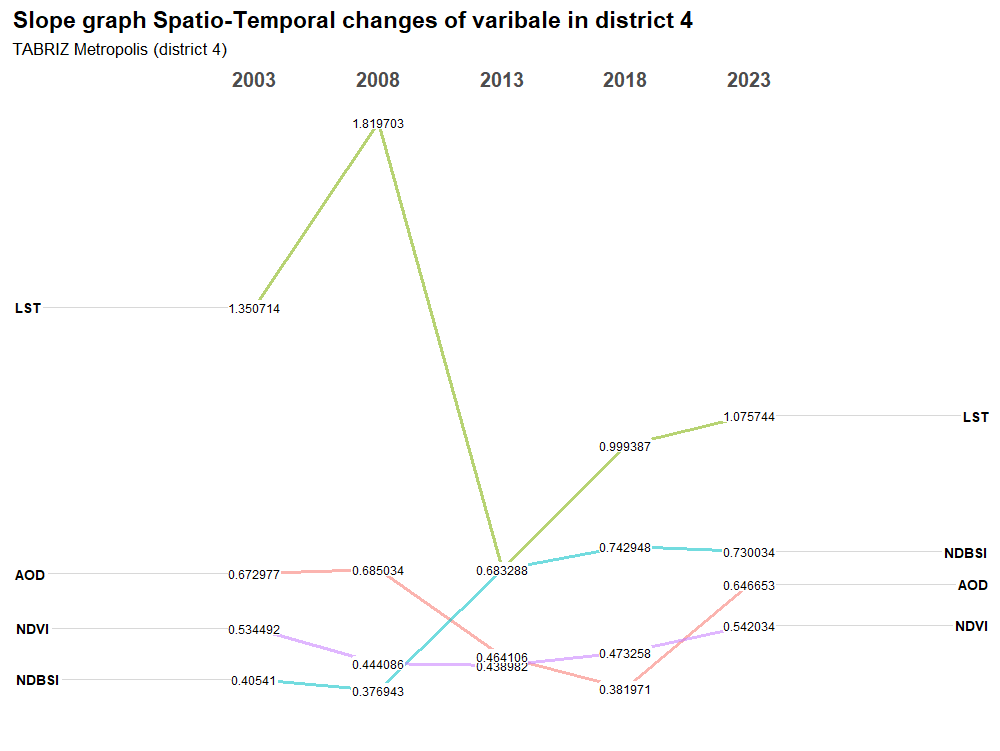
**

**Figure SM5.** …..

**
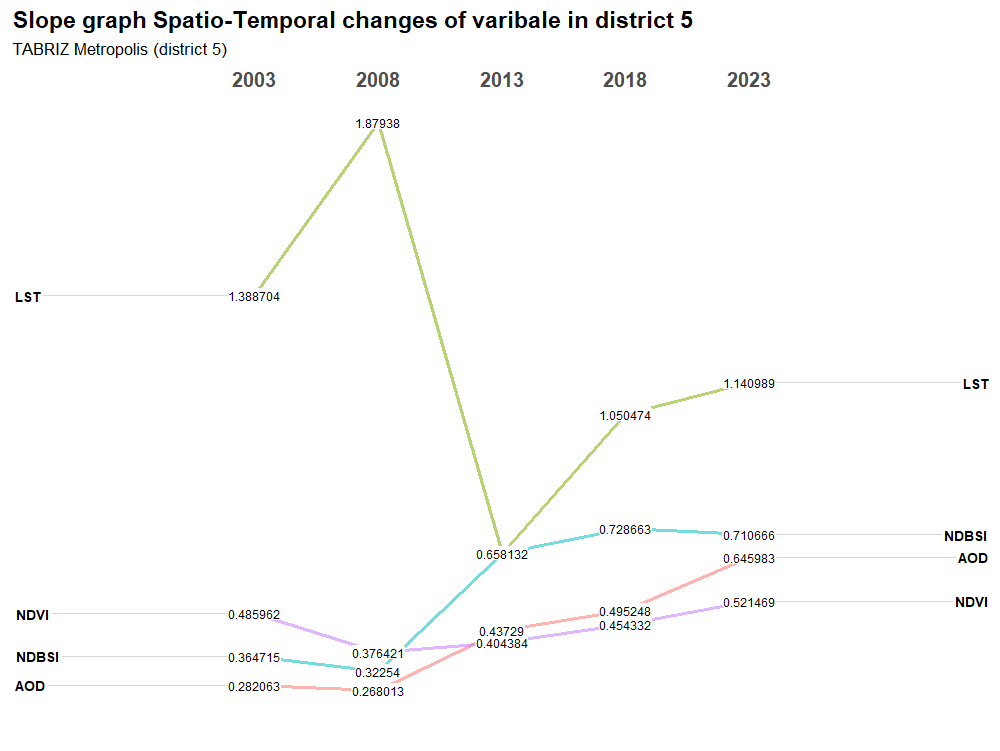
**

**Figure SM6.** …..

**
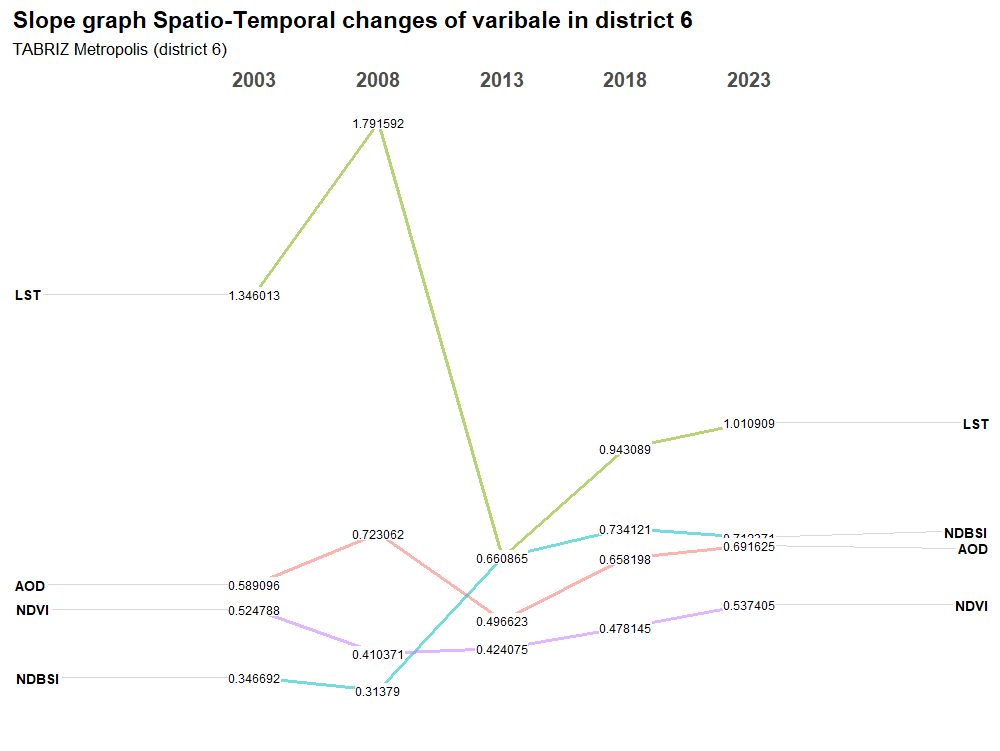
**

**Figure SM7.** …..

**
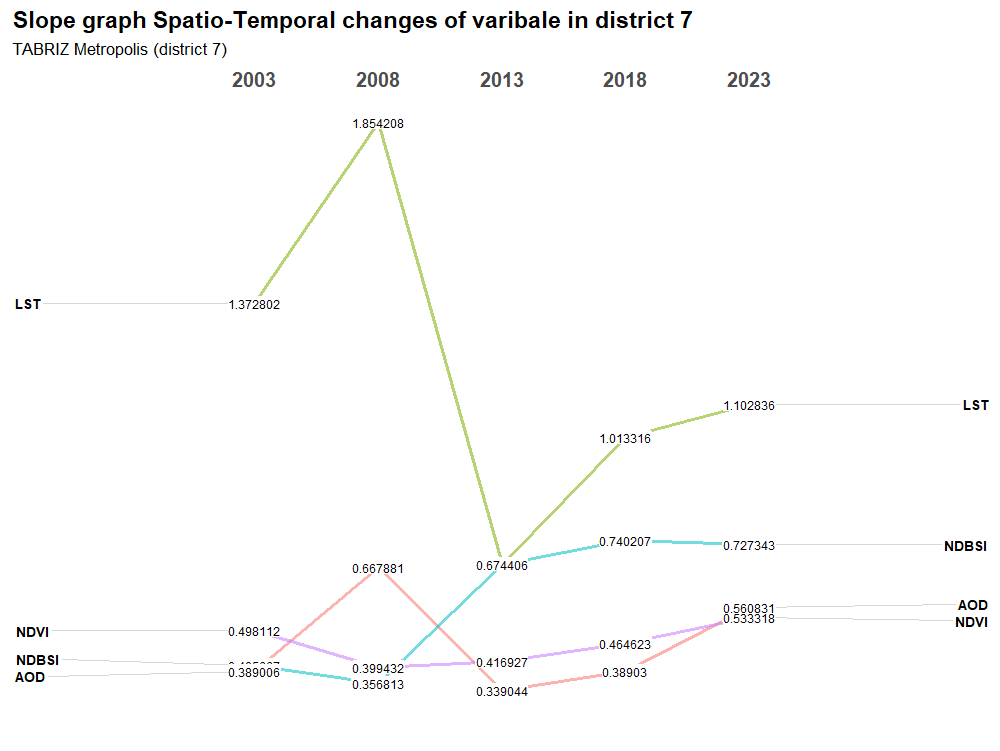
**

**Figure SM8.** …..

**
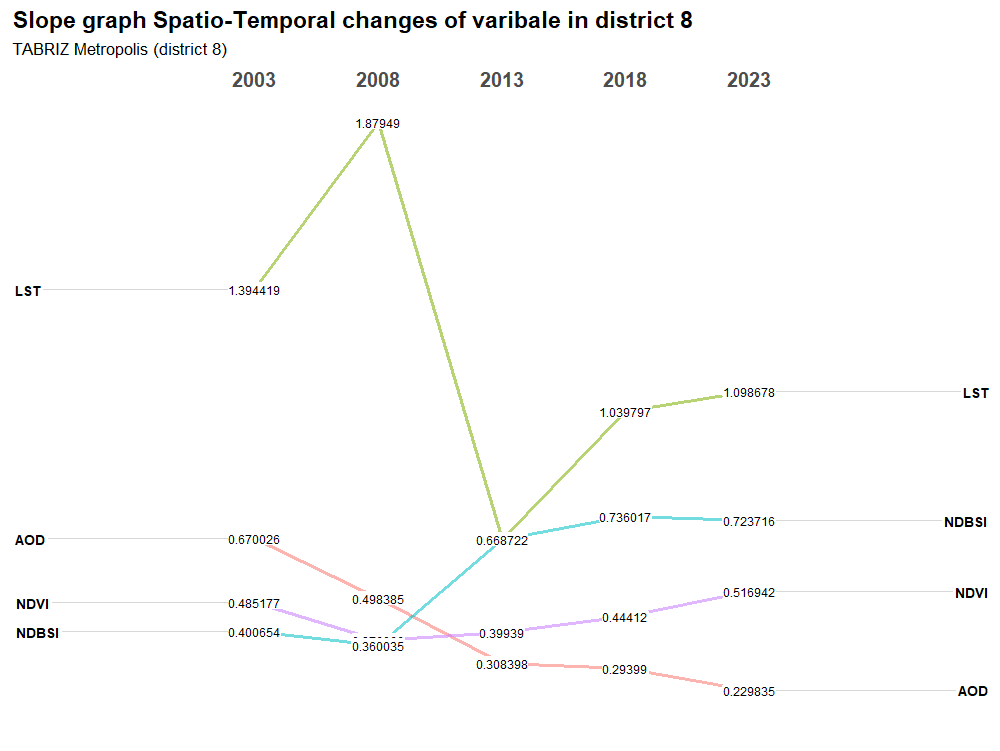
**

**Figure SM9.** …..

**
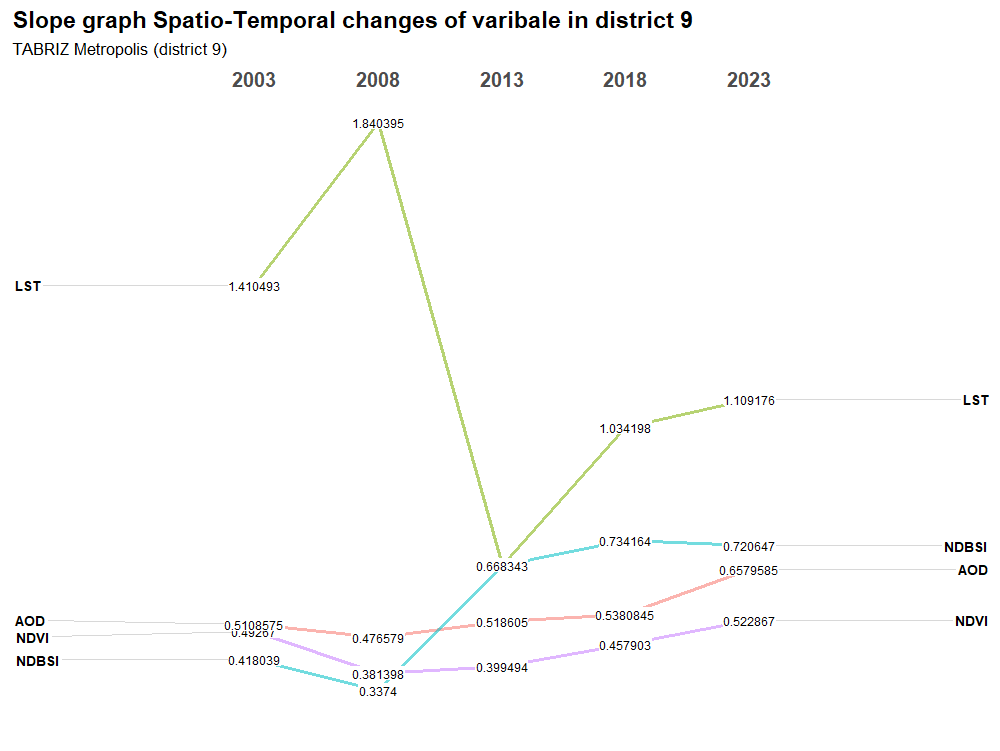
**

**Figure SM10.** …..

**
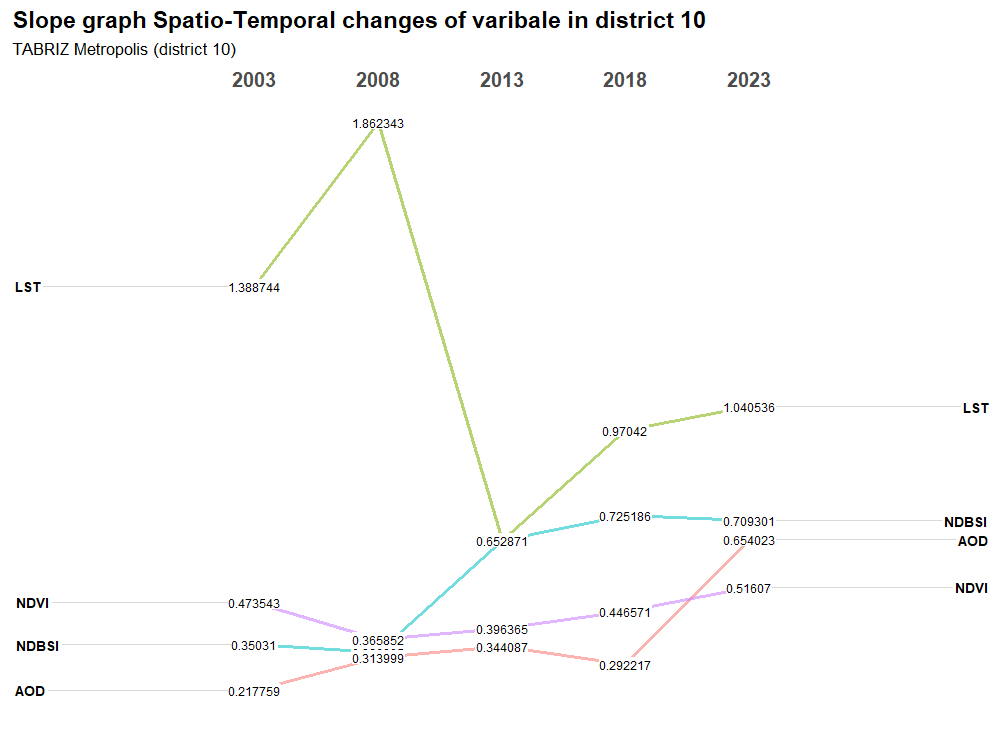
**
